# Supplementary material
Source: PubMed Central journal article supplement (PMC5833523)
Supplement: jamacardiol-e174266-s001.pdf [file jamacardiol-e174266-s001.pdf]

## Supplementary Online Content

Chen HY, Dufresne L, Burr H, et al. Association of *LPA* variants with aortic stenosis: a large-scale study using diagnostic and procedural codes from electronic health records. *JAMA Cardiol*. Published online November 12, 2017.  
doi:10.1001/jamacardio.2017.4266

**eTable 1.** Association of *LPA* Variants With AS in Multivariable Models Adjusted for Cardiovascular Risk Factors and CAD

**eTable 2.** Association of *LPA* Variants With Age of Diagnosis of AS

**eTable 3.** Interaction of *LPA* Variants With Clinical Risk Factors For Associations With AS

This supplementary material has been provided by the authors to give readers additional information about their work.

**eTable 1:** Association of *LPA* variants with AS in multivariable models adjusted for cardiovascular risk factors and CAD.

| <i>LPA</i> Variant | Association with AS<br>(n = 42,353) |                      |
|--------------------|-------------------------------------|----------------------|
|                    | OR (95% CI)                         | p Value              |
| rs10455872         | 1.26 (1.14-1.38)                    | $2.5 \times 10^{-6}$ |
| rs3798220          | 1.26 (1.04-1.53)                    | 0.017                |
| Risk score         | 1.27 (1.16-1.38)                    | $9.1 \times 10^{-8}$ |

Models were adjusted for age, age<sup>2</sup>, sex, dyslipidemia, smoking, diabetes mellitus, hypertension, and CAD. Odds ratios are per risk allele. AS: aortic stenosis; CAD: coronary artery disease; CI: confidence interval; OR: odds ratio.

**eTable 2:** Association of *LPA* variants with age of diagnosis of AS.

| <b><i>LPA</i> Variant</b> | <b>Effect Size in Years (95% CI)</b> | <b>p Value</b> |
|---------------------------|--------------------------------------|----------------|
| rs10455872                | -0.71 (-1.42 to 0.00)                | 0.049          |
| rs3798220                 | -0.25 (-1.68 to 1.19)                | 0.74           |
| Risk score                | -0.64 (-1.28 to 0.01)                | 0.052          |

Models were adjusted for sex. AS: aortic stenosis; CI: confidence interval; OR: odds ratio.

**eTable 3:** Interaction of *LPA* variants with clinical risk factors, for associations with AS.

| Risk Factor       | n      | Interaction Term with <i>LPA</i> Variant |         |                  |         |                  |         |
|-------------------|--------|------------------------------------------|---------|------------------|---------|------------------|---------|
|                   |        | rs10455872                               |         | rs3798220        |         | Risk Score       |         |
|                   |        | OR (95% CI)                              | p Value | OR (95% CI)      | p Value | OR (95% CI)      | p Value |
| Dyslipidemia      | 44,703 | 0.91 (0.73-1.13)                         | 0.40    | 0.94 (0.59-1.50) | 0.80    | 0.92 (0.75-1.12) | 0.39    |
| Smoking           | 42,353 | 1.12 (0.93-1.36)                         | 0.23    | 1.10 (0.75-1.60) | 0.64    | 1.12 (0.95-1.33) | 0.18    |
| Diabetes mellitus | 44,703 | 0.92 (0.71-1.18)                         | 0.50    | 0.86 (0.51-1.46) | 0.58    | 0.90 (0.72-1.14) | 0.38    |
| Hypertension      | 44,703 | 0.96 (0.80-1.15)                         | 0.64    | 0.72 (0.50-1.04) | 0.077   | 0.90 (0.76-1.06) | 0.22    |

The reference groups for dyslipidemia, smoking, diabetes mellitus, and hypertension were individuals without dyslipidemia, non-smokers, individuals without diabetes mellitus, and individuals without hypertension, respectively. Models were adjusted for age, age<sup>2</sup>, and sex. AS: aortic stenosis; CI: confidence interval; OR: odds ratio.
